# Supplementary material
Source: PubMed Central journal article supplement (PMC6454415)
Supplement: ehy645_supplementary_references.pdf [file ehy645_supplementary_references.pdf]

References are available as supplementary material at *European Heart Journal* online

**Title: Emerging Applications of Coronary CT Angiography in Coronary Heart Disease: Getting Better with Time**

**References**

1. Sandfort, V., Lima, J.A.C. & Bluemke, D.A. Noninvasive Imaging of Atherosclerotic Plaque Progression. *Circulation: Cardiovascular Imaging* **8**(2015).
2. Andreini, D., *et al.* Diagnostic Performance of a Novel Coronary CT Angiography Algorithm: Prospective Multicenter Validation of an Intracycle CT Motion Correction Algorithm for Diagnostic Accuracy. *AJR. American journal of roentgenology* **210**, 1208-1215 (2018).
3. Sekhri, N., Feder, G.S., Junghans, C., Hemingway, H. & Timmis, A.D. How effective are rapid access chest pain clinics? Prognosis of incident angina and non-cardiac chest pain in 8762 consecutive patients. *Heart* **93**, 458-463 (2007).
4. Budoff, M.J., *et al.* Diagnostic performance of 64-multidetector row coronary computed tomographic angiography for evaluation of coronary artery stenosis in individuals without known coronary artery disease: results from the prospective multicenter ACCURACY (Assessment by Coronary Computed Tomographic Angiography of Individuals Undergoing Invasive Coronary Angiography) trial. *Journal of the American College of Cardiology* **52**, 1724-1732 (2008).
5. Meijboom, W.B., *et al.* Diagnostic accuracy of 64-slice computed tomography coronary angiography: a prospective, multicenter, multivendor study. *Journal of the American College of Cardiology* **52**, 2135-2144 (2008).
6. investigators, S.-H. CT coronary angiography in patients with suspected angina due to coronary heart disease (SCOT-HEART): an open-label, parallel-group, multicentre trial. *Lancet* **385**, 2383-2391 (2015).
7. Douglas, P.S., *et al.* Outcomes of anatomical versus functional testing for coronary artery disease. *The New England journal of medicine* **372**, 1291-1300 (2015).
8. Min, J.K., *et al.* Rationale and design of the CONFIRM (COronary CT Angiography EvaluationN For Clinical Outcomes: An InteRnational Multicenter) Registry. *Journal of cardiovascular computed tomography* **5**, 84-92 (2011).
9. Al-Mallah, M.H., *et al.* Does coronary CT angiography improve risk stratification over coronary calcium scoring in symptomatic patients with suspected coronary artery disease? Results from the prospective multicenter international CONFIRM registry. *European heart journal cardiovascular Imaging* **15**, 267-274 (2014).
10. Georgiou, D., *et al.* Screening patients with chest pain in the emergency department using electron beam tomography: a follow-up study. *Journal of the American College of Cardiology* **38**, 105-110 (2001).
11. Cho, I., *et al.* Prognostic value of coronary computed tomographic angiography findings in asymptomatic individuals: a 6-year follow-up from the prospective

- multicentre international CONFIRM study. *European heart journal* **39**, 934-941 (2018).
12. Han, D., *et al.* Incremental prognostic value of coronary computed tomography angiography over coronary calcium scoring for major adverse cardiac events in elderly asymptomatic individuals. *European heart journal cardiovascular Imaging* **19**, 675-683 (2018).
  13. Andelius, L., Mortensen, M.B., Norgaard, B.L. & Abdulla, J. Impact of statin therapy on coronary plaque burden and composition assessed by coronary computed tomographic angiography: a systematic review and meta-analysis. *European heart journal cardiovascular Imaging* (2018).
  14. Lo, J., *et al.* Effects of statin therapy on coronary artery plaque volume and high-risk plaque morphology in HIV-infected patients with subclinical atherosclerosis: a randomised, double-blind, placebo-controlled trial. *The Lancet HIV* **2**, e52-e63 (2015).
  15. Motoyama, S., *et al.* Plaque Characterization by Coronary Computed Tomography Angiography and the Likelihood of Acute Coronary Events in Mid-Term Follow-Up. *Journal of the American College of Cardiology* **66**, 337-346 (2015).
  16. Vaidya, K., *et al.* Colchicine Therapy and Plaque Stabilization in Patients With Acute Coronary Syndrome: A CT Coronary Angiography Study. *JACC. Cardiovascular imaging* **11**, 305-316 (2018).
  17. Ridker, P.M., *et al.* Antiinflammatory Therapy with Canakinumab for Atherosclerotic Disease. *The New England journal of medicine* **377**, 1119-1131 (2017).
  18. Elnabawi, Y. Immunomodulatory therapy reduces atherosclerotic plaque burden by coronary computed tomography angiography in psoriasis at one-year. *Catheterization and Cardiovascular Interventions* **91**, S5-S6 (2018).
  19. Tesche, C., *et al.* Coronary CT Angiography–derived Fractional Flow Reserve. *Radiology* **285**, 17-33 (2017).
  20. Collet, C., *et al.* Fractional Flow Reserve Derived From Computed Tomographic Angiography in Patients With Multivessel CAD. *Journal of the American College of Cardiology* **71**, 2756-2769 (2018).
  21. Antonopoulos, A.S., *et al.* Detecting human coronary inflammation by imaging perivascular fat. *Science Translational Medicine* **9**(2017).
  22. Goeller, M., Achenbach, S., Cadet, S. & *et al.* Pericoronary adipose tissue computed tomography attenuation and high-risk plaque characteristics in acute coronary syndrome compared with stable coronary artery disease. *JAMA Cardiology* (2018).
